# Supplementary material for: Structural factors for activating anionic redox in Li-rich Ti-based cathodes
Source: Royal Society of Chemistry journal article supplement (doi:10.1039/d3ta02537c), 2023-01-01
Supplement: d3ta02537c1.pdf [file d3ta02537c1.pdf]

1  
2  
3  
4  
5  
6  
7  
8  
9  
10  
11  
12

Electronic Supplementary Information

**Structural Factors for Activating Anionic Redox in Li-rich Ti-based Cathodes**

Dohyeong Kwon<sup>a</sup>, and Duho Kim<sup>ab,\*</sup>

<sup>a</sup>Department of Mechanical Engineering (Integrated Engineering Program), Kyung Hee University, 1732, Deogyong-daero, Giheung-gu, Yongin-si, Gyeonggi-do, 17104, Republic of Korea. E-mail: [duhokim@khu.ac.kr](mailto:duhokim@khu.ac.kr) (Prof. D. Kim).

<sup>b</sup>Department of KHU-KIST Convergence Science and Technology Kyung Hee University 23, Kyunghee-daero Dongdaemun-gu, Seoul 02447, Republic of Korea

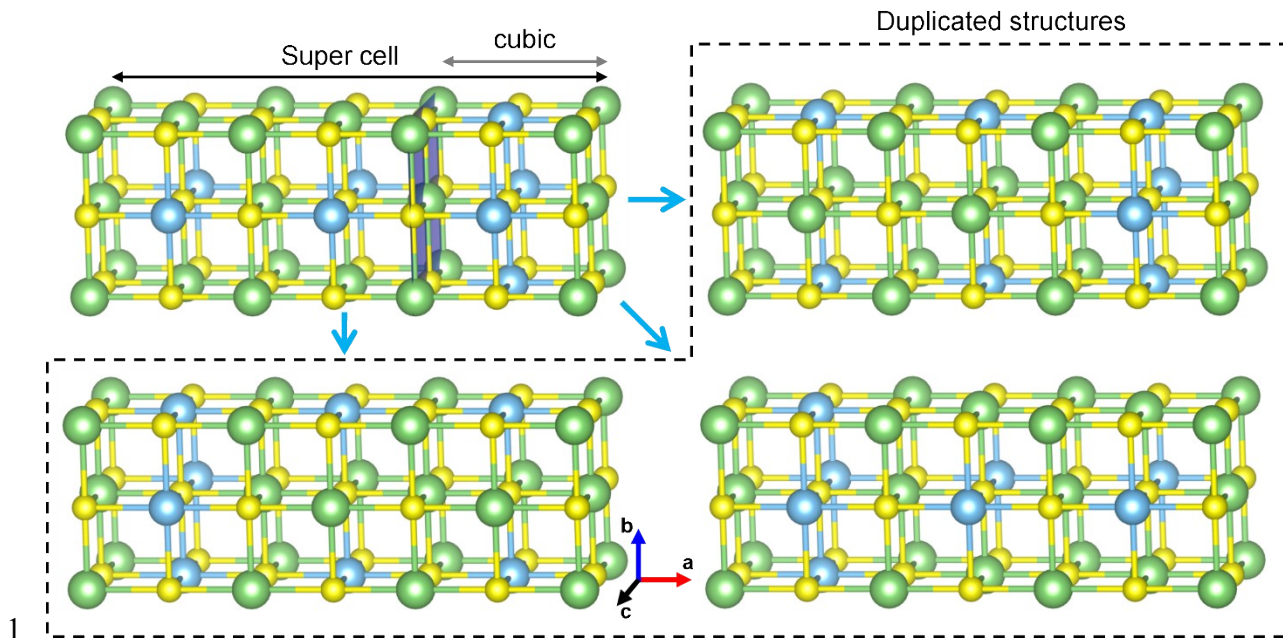

2 **Fig. S1.** Elongated supercell rock salt structure of  $\text{Li}_2\text{TiS}_3$  as an example having same chemical  
 3 formula as an example of duplicated ion configuration. The base cubic system was designed  
 4 based on the rocksalt NaCl. We contemplated all possible cation ordering about Li/Ti position  
 5 and eliminated duplicate structures to make an energy distribution histogram.

6

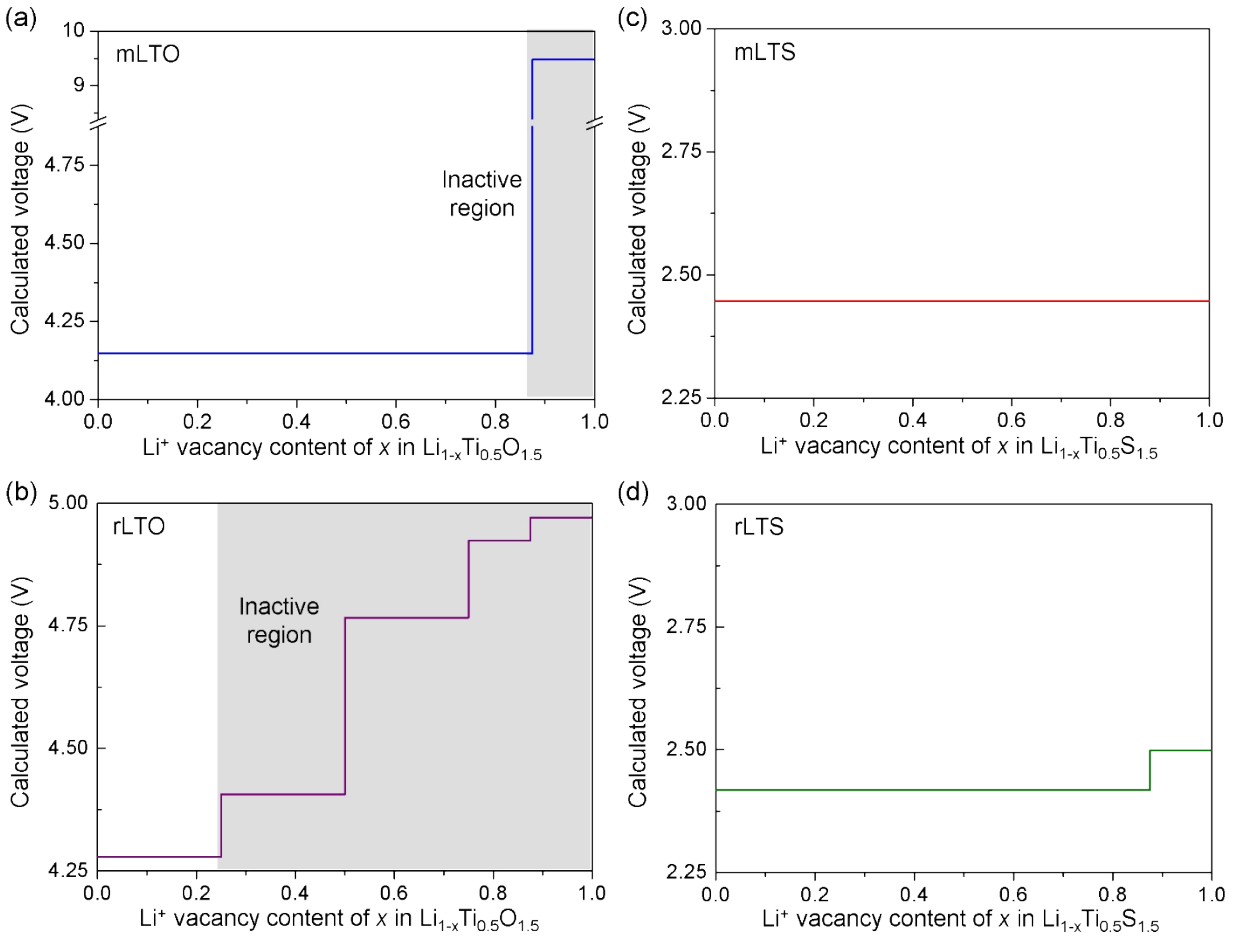

1

2 **Fig. S2.** (a-d) calculated voltages based on the mixing enthalpy as a function of Li ion vacancy  
 3 content ( $x$ ) in  $\text{Li}_{1-x}\text{Ti}_{0.5}\text{A}_{1.5}$  of 4 systems.

4

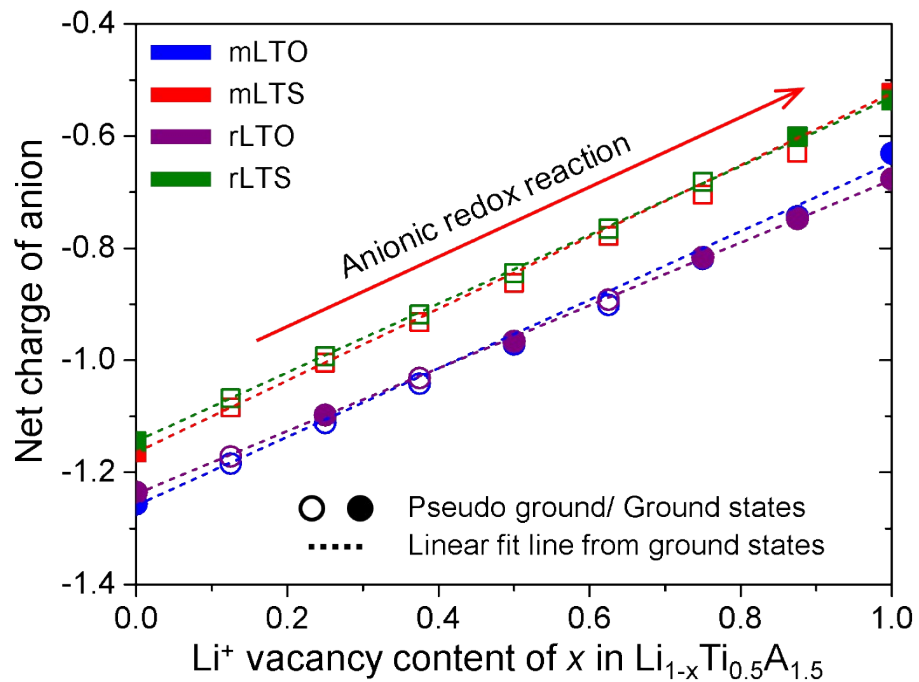

1

2 **Fig. S3.** Bader charge analysis of 4 systems as a function of Li ion vacancy content ( $x$ ) in  $\text{Li}_{1-x}\text{Ti}_{0.5}\text{A}_{1.5}$ .

3  $\text{Li}_{1-x}\text{Ti}_{0.5}\text{A}_{1.5}$ .

4

1

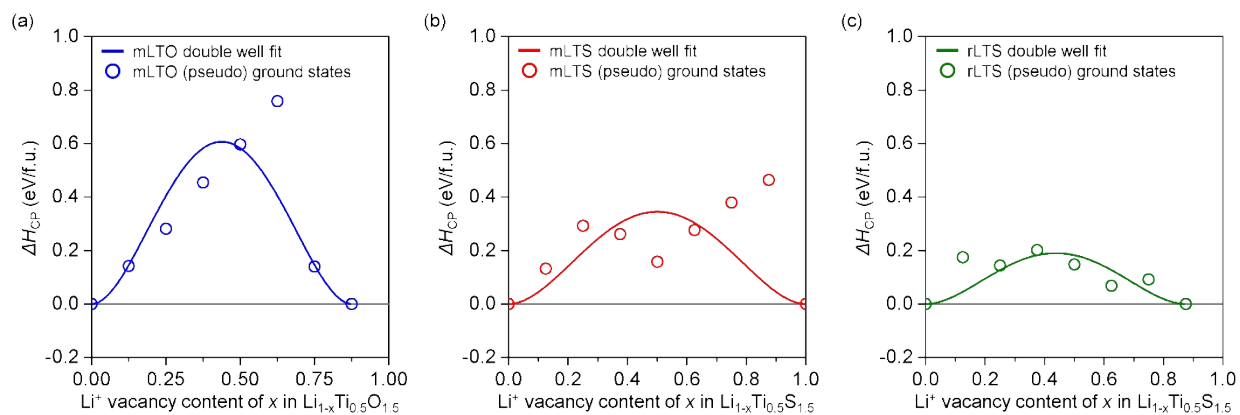

2

3 **Fig. S4.** Combined phase mixing enthalpies of 4 systems. The  $\Delta H_{cp}$  are fit using quadratic double

4 well function based on ground and pseudo-ground states .

5

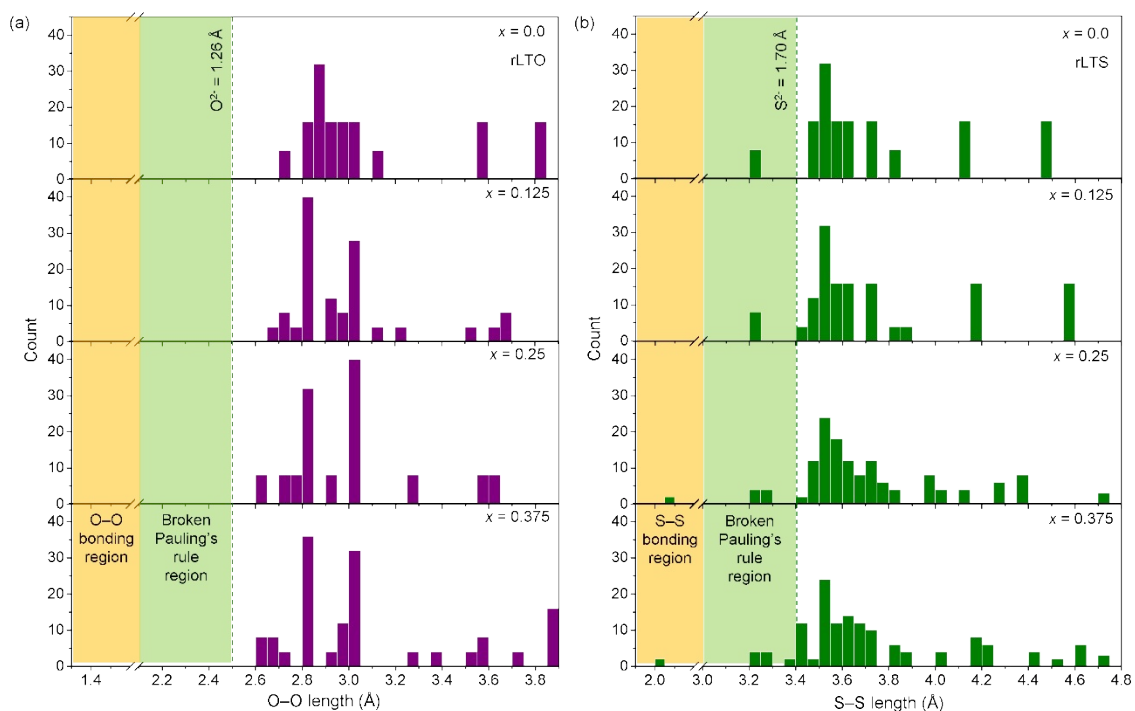

1

2 **Fig. S5.** population of A–A distance of (a) rLTO and (b) rLTS during delithiation process till  $x = 0.375$   
 3 in  $\text{Li}_{1-x}\text{Ti}_{0.5}\text{A}_{1.5}$ . The green filled region indicates broken structure stability regarding Pauling's rule  
 4 and anion radius  $A^{2-}$  in 6 coordination number and the yellow filled area display chemical bonds  
 5 evolving between each anion.

6

7
